# Supplementary material for: Self-rechargeable cardiac pacemaker system with triboelectric nanogenerators
Source: PubMed Central journal article supplement (PMC8285394; doi:10.1038/s41467-021-24417-w), 2021-07-16
Supplement: 41467_2021_24417_MOESM1_ESM.pdf [file 41467_2021_24417_MOESM1_ESM.pdf]

1 **SUPPLEMENTARY MATERIALS**

2

3 **Self-rechargeable cardiac pacemaker system with triboelectric**  
4 **nanogenerators**

5 Hanjun Ryu<sup>1†</sup>, Hyun-moon Park<sup>2†</sup>, Moo-Kang Kim<sup>3</sup>, Bosung Kim<sup>1</sup>, Hyoun Seok Myoung<sup>2</sup>, Tae  
6 Yun Kim<sup>1</sup>, Hong-Joon Yoon<sup>1</sup>, Sung Soo Kwak<sup>1</sup>, Jihye Kim<sup>1</sup>, Tae Ho Hwang<sup>4</sup>, Eue-Keun Choi<sup>3</sup>  
7 and Sang-Woo Kim<sup>1,5\*</sup>

8

9 <sup>1</sup>School of Advanced Materials Science and Engineering, Sungkyunkwan University (SKKU),  
10 Suwon, 16419, Republic of Korea.

11 <sup>2</sup>Research and Development Center, Energy-Mining LTD., Seoul, 06555, Republic of Korea.

12 <sup>3</sup>Department of Internal Medicine, Seoul National University Hospital, Seoul, 03080, Republic  
13 of Korea.

14 <sup>4</sup>SoC Platform Research Center, Korea Electronics Technology Institute (KETI), Seongnam,  
15 13509, Republic of Korea.

16 <sup>5</sup>SKKU Advanced Institute of Nanotechnology (SAINT) and Samsung Advanced Institute for  
17 Health Sciences & Technology (SAIHST), Sungkyunkwan University (SKKU), Suwon 16419,  
18 Republic of Korea.

19

20

21 <sup>†</sup>These authors contributed equally to this work.

22 \*E-mail: kimsww1@skku.edu (S.-W. Kim)

23

24 **Note 1. Analysis of the amine-functionalized poly(vinyl alcohol).**

25 In order to confirm amine functionalization, chemical modification of PVA was monitored by  
26 Fourier transform infrared spectroscopy (FT-IR). Supplementary Fig. 1a presents the FT-IR  
27 spectrum of PVA-NH<sub>2</sub>. A large peak at 3300 cm<sup>-1</sup> was the stretching of O-H, a peak at 1920 cm<sup>-1</sup>  
28 was the stretching vibration of C-H from the alkyl group, and a peak at 1590 cm<sup>-1</sup> indicated primary  
29 amine function.

30 Kelvin probe force microscopy (KPFM) was used to measure the surface potential of PVA-  
31 NH<sub>2</sub> (see Supplementary Fig. 1b). The surface potential of a material is one of the important factors  
32 that determine its triboelectric properties. The surface potential of pristine PVA was 247 mV<sup>22</sup>,  
33 and that of amine-functionalized PVA was 505 mV. Thus, the increased surface potential of PVA-  
34 NH<sub>2</sub> had a more positive triboelectric property than did pristine PVA.

35 In order to verify the PVA-NH<sub>2</sub> mechanical coating property, a steel wool abrasion test  
36 was performed for 500 cycles with #0000 steel wool under a load weight of 250 g and a scratch  
37 velocity of 5 mm/s (see Supplementary Fig. 1c). After 500 cycles, the PVA-NH<sub>2</sub> did not have  
38 significant detachment but only shallow scratches. A pencil hardness test with a load weight of  
39 350 g and a velocity of 1.75 mm/s was also performed to verify the hardness of the PVA-NH<sub>2</sub> (see  
40 Supplementary Fig. 1d). A pencil of 9H hardness made a slight indentation on the PVA-NH<sub>2</sub>.  
41 Therefore, the PVA-NH<sub>2</sub> film had strong adhesion and mechanical durability.

42

43 **Note 2. The working mechanism of the I-TENG.**

44 To identify the working mechanism of the I-TENG, a detailed cyclic process was used, as shown  
45 in Supplementary Fig. 2. It depended on the movement of the freestanding unit without the initial  
46 contact electrification process. The PFA layer has negative triboelectric charges on its surface, the  
47 PVA-NH<sub>2</sub> has positive triboelectric charges, the Cu electrode has positive charges to neutralize  
48 the negative triboelectric charges on the PFA, and the top and bottom Au electrodes have negative  
49 charges to neutralize the positive triboelectric charges on the PVA-NH<sub>2</sub>. During the initial stage,  
50 when the body moves vertically upwards, the I-TENG moves up with the body. At this time, all  
51 individual parts have the same vertical velocity, so the freestanding unit is not separated from the  
52 bottom PVA-NH<sub>2</sub> (see Supplementary Fig. 2a). When the vertical body motion slows, the  
53 freestanding unit detaches vertically from the bottom PVA-NH<sub>2</sub> layer due to inertia, while the  
54 package is slowed by human motion (see Supplementary Fig. 2b). To reach equilibrium, electrons  
55 flow from the Cu mass to the bottom Au electrode through an external circuit. A specially designed  
56 structure limits the maximum displacement of the freestanding unit as it collides with the top PVA-  
57 NH<sub>2</sub> layer. As the freestanding unit approaches the top PVA-NH<sub>2</sub> layer, negative charges on the  
58 top Au electrode are neutralized, and electrons flow from the top Au electrode to the Cu through  
59 the external circuit until electrical equilibrium is reached (see Supplementary Fig. 2c, 2d). Since  
60 the freestanding unit loses vertical upward inertia and the body moves vertically downwards, the  
61 freestanding unit is separated from the top PVA-NH<sub>2</sub> layer by gravity (see Supplementary Fig. 2e).  
62 To reach equilibrium again, electrons flow from the Cu to the top Au electrode through the external  
63 circuit in all I-TENGs. After the freestanding unit contacts the bottom PVA-NH<sub>2</sub> layer, negative  
64 charges on the bottom Au electrode are neutralized, and electrons flow into the Cu via the external  
65 circuit until equilibrium is reached (see Supplementary Fig. 2f, 2a).

66

67 **Note 3. Mass, gap, and surface design of the I-TENG.**

68 Electrostatic attraction force between the positive and negative triboelectric layers should be  
69 weaker than the applied inertial force in order to separate the two materials. The electrostatic  
70 attraction force ( $F_{Electrostatic}$ ) and applied inertial force ( $F_{Inertia}$ ) of the device are given as

71  $F_{Inertia} > F_{Electrostatic}$  (1)

72 
$$F_{Electrostatic} = \frac{Q^2}{2\epsilon_0\epsilon_{r,air}A} = \frac{(42 \times 10^{-9})^2}{2 \times 8.85 \times 10^{-12} \times 4.9 \times 10^{-4}} = 0.205 \text{ N}$$
 (2)

73 
$$F_{Inertia} = ma = 3.318 \times 10^{-3} \times 8.22 \times 9.8 = 0.256 \text{ N}$$
 (3)

74 where  $Q$  is the surface triboelectric charge,  $\epsilon_0$  is vacuum permittivity,  $\epsilon_{r,air}$  is relative air  
75 permittivity,  $A$  is the surface area of the triboelectric layer,  $m$  is the weight of the Cu mass, and  $a$   
76 is acceleration. When the thickness of the Cu is above 0.7 mm and acceleration is 8.22 g,  $F_{Inertia}$  is  
77 larger than  $F_{Electrostatic}$ . Therefore, the Cu mass should be thicker than 0.7 mm (see Supplementary  
78 Fig. 4a).

79 In order to identify the optimal gap distance between the positive and negative triboelectric  
80 layers, we assessed charge transfer efficiency depending on the gap distance, expressed as

81 Charge transfer efficiency =  $\frac{\Delta\sigma}{\sigma} = \frac{z}{d_{PFA}\epsilon_0/\epsilon_{PFA} + d_{PVA-NH_2}\epsilon_0/\epsilon_{PVA-NH_2} + z} \times 100(\%)$  (4)

82 where  $\sigma$  is the triboelectric surface charge,  $d$  is the thickness,  $\epsilon$  is relative permittivity,  $\epsilon_0$  is vacuum  
83 permittivity, and  $z$  is the gap distance between the top and bottom triboelectric materials. As shown  
84 in Supplementary Fig. 4b, charge transfer efficiency was related to gap distance, and 1 mm of gap  
85 distance secures a 99% charge transfer efficiency. Thus, a 1 mm gap distance between the positive  
86 and negative triboelectric layers is sufficient.

87 The output voltage of the I-TENGs is strongly affected by surface area, so increasing the  
88 surface area by surface treatment is an efficient strategy for increasing output voltage. Output  
89 voltage at a load resistance of  $V_{load}(t)$  is expressed as

90 
$$V_{load}(t) = RI_{load}(t) = R^2 A \frac{d\sigma(z,t)}{dt}$$
 (5)

91 where  $R$  is the load resistance,  $I_{load}(t)$  is output current at a load resistance,  $A$  is the surface area,  
92 and  $\frac{d\sigma(z,t)}{dt}$  is a gap- and time-dependent surface charge density. COMSOL Multiphysics

93 simulation results showed that micro/nano surface treatment of the PFA increased the total surface  
94 area, which resulted in a higher output voltage than that of untreated PFA (see Supplementary Fig.  
95 4c and 4d).

96

97 **Note 4. Calculation of the internal energy conversion efficiency.**

98 In order to estimate the kinetic behavior of the five-stacked I-TENG, the velocity of the I-TENG  
99 was calculated using the measured acceleration of the I-TENG (see Supplementary Fig. 10). The  
100 input kinetic energy of the I-TENG is derived as

101 Input kinetic energy =  $\left[ \frac{1}{2} m v^2 \right]_{v_{\text{initial}}}^{v_{\text{max}}} = \frac{1}{2} \times 28.5 \text{ (g)} \times 0.34 \text{ (m}^2\text{s}^{-2}) = 4.845 \text{ mJ}$  (6)

102 Output electric energy of the I-TENGs is expressed as

103 Output electric energy =  $W_{RMS} \times (t_1 - t_0) = 38.1 \text{ (}\mu\text{W)} \times 0.3 \text{ (s)} = 11.43 \text{ }\mu\text{J}$  (7)

104 Therefore, the internal energy conversion efficiency of the I-TENG can be defined as the ratio  
105 between the output electric energy and the input kinetic energy of the I-TENG, which is expressed  
106 as

107 Internal energy conversion efficiency =  $\frac{\text{Output electric energy}}{\text{Input kinetic energy}} = \frac{11.43}{4845} \times 100 = 0.235\%$  (8)

108 Therefore, the internal energy conversion efficiency of the I-TENG is 0.235%.

109

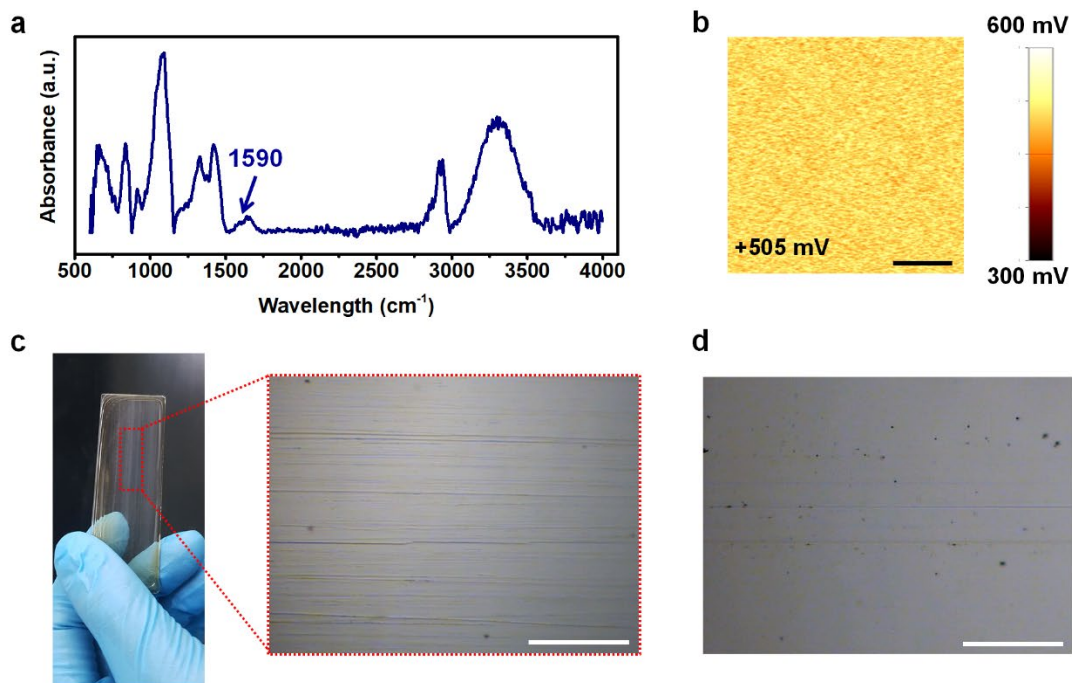

110

111 **Fig. 1 Property of the amine-functionalized poly(vinyl alcohol).** (a) FT-IR result of the PVA-  
 112 NH<sub>2</sub> thin film. (b) KPFM image of the PVA-NH<sub>2</sub> thin film. scale bar, 5 μm. (c) A photographic  
 113 image of the steel wool abrasion-tested PVA-NH<sub>2</sub>. An inset optical microscopy image shows the  
 114 surface of the PVA-NH<sub>2</sub> thin film. scale bar, 5 mm. (d) An optical microscopy image after the 9H  
 115 pencil hardness test of the PVA-NH<sub>2</sub> thin film. scale bar, 5 mm. Three repeated experiments were  
 116 performed.

117

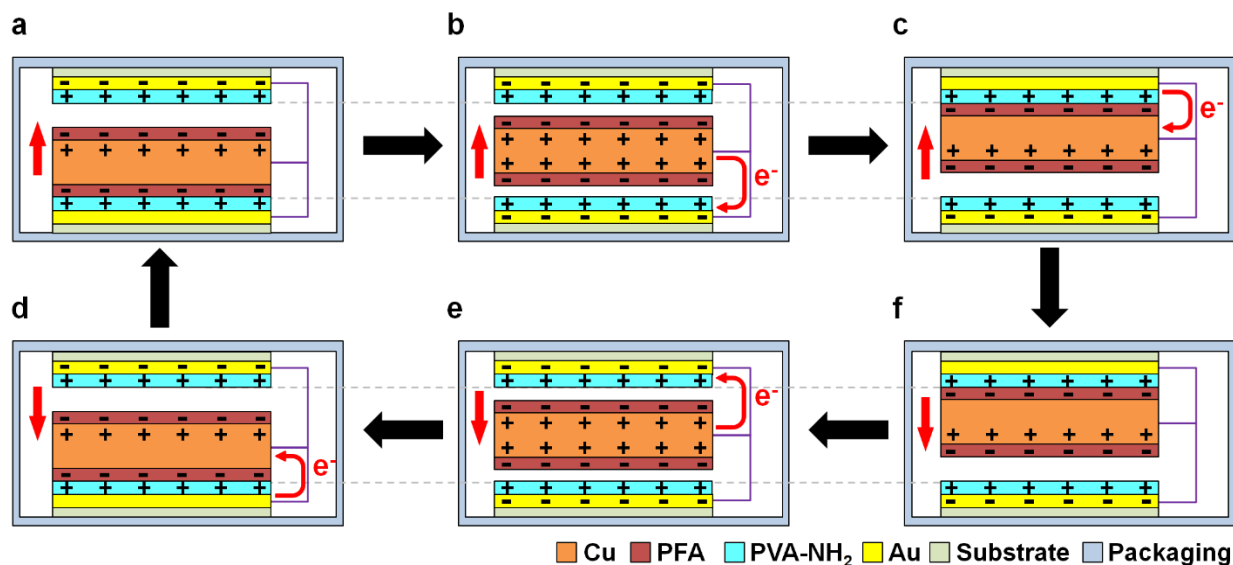

118

119 **Fig. 2 The working mechanism of the I-TENG driven by biomechanical energy.** (a) The initial  
 120 state, in which all parts move upward. (b) The intermediate state, in which the freestanding unit  
 121 moves upward. (c) The final state, in which the freestanding unit contacts the PVA-NH<sub>2</sub> layer. (d)  
 122 The second initial state, in which the freestanding unit begins to move downward due to gravity.  
 123 (e) The intermediate state, in which the freestanding unit moves downward. (f) The second final  
 124 state, in which the freestanding unit contacts the PVA-NH<sub>2</sub> layer.

125



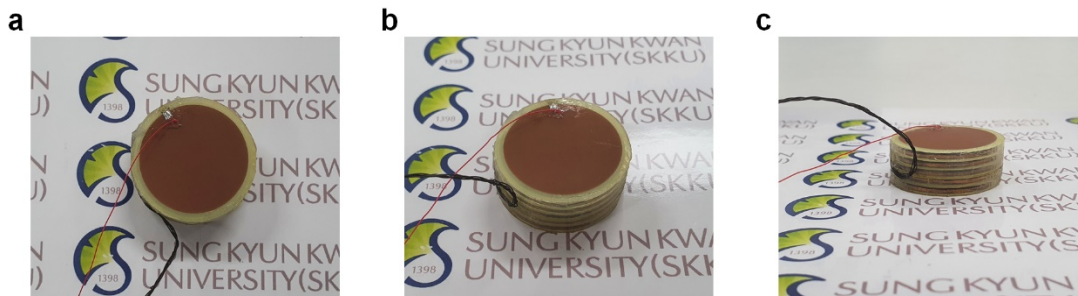

126

127 **Fig. 3** Photo images of the five-stacked I-TENGs from (a) top, (b) tilted, and (c) side views.

128

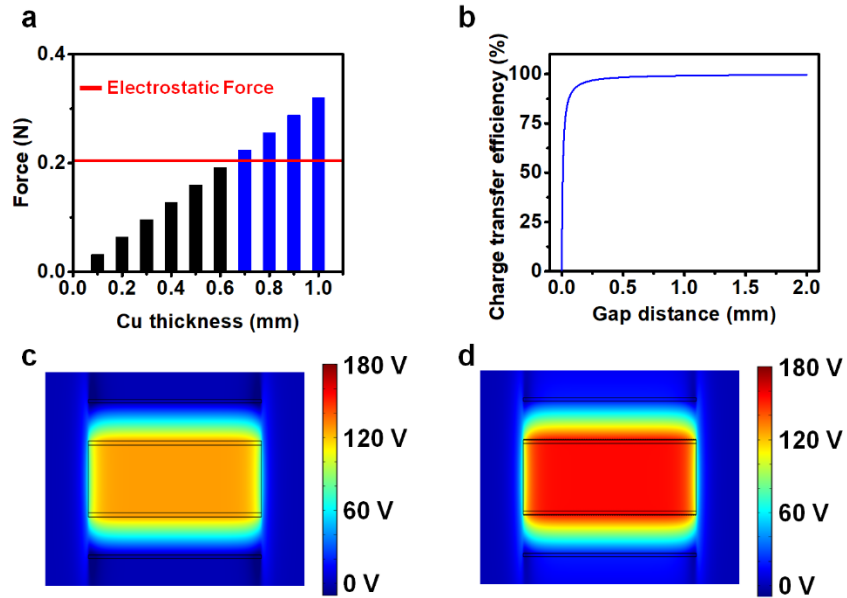

129

130 **Fig. 4 Mass, gap, and surface design of the I-TENG.** (a) The kinetic force of the freestanding  
 131 unit depends on the thickness of Cu. (b) The charge transfer efficiency depends on the gap distance  
 132 of the I-TENG. Voltage potential distribution of the I-TENG using (c) untreated PFA and PVA-  
 133 NH<sub>2</sub> and (d) treated PFA and PVA-NH<sub>2</sub> as triboelectric materials.

134

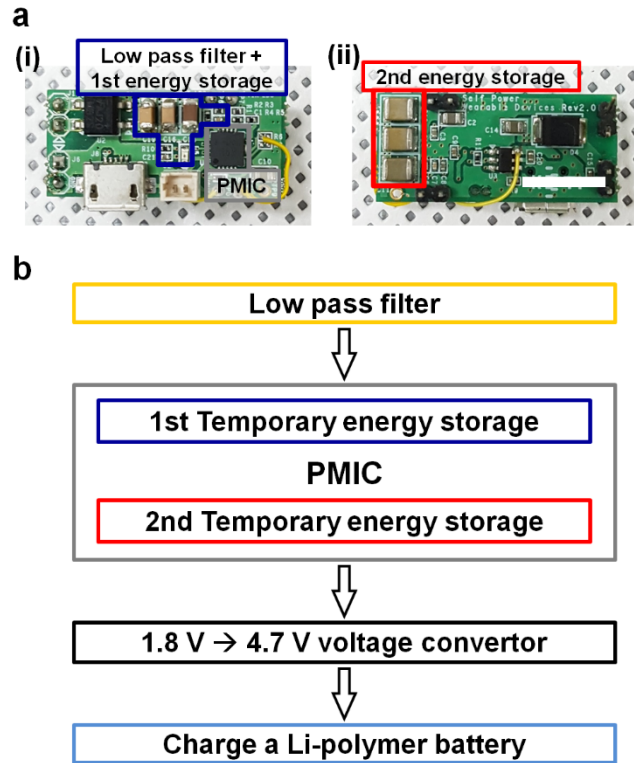

135

136 **Fig. 5 The power management system.** (a) Photographs of the (i) front and (ii) back of the power  
 137 management system. scale bar, 1 cm. (b) System-level block diagram of the power management  
 138 system for the I-TENG.

139

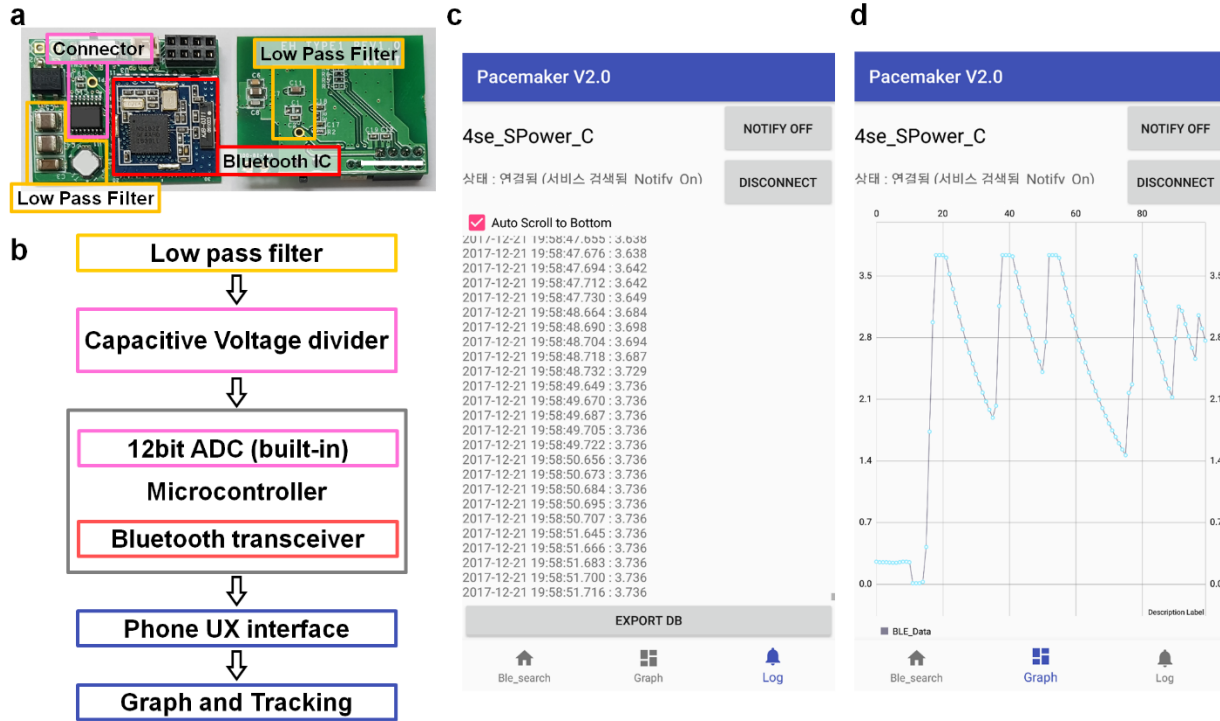

140  
 141  
 142  
 143  
 144  
 145

**Fig. 6 The wireless monitoring system. (a)** A photograph of the wireless monitoring system. scale bar, 1cm. **(b)** System-level block diagram of the wireless monitoring system. Screenshot of the **(c)** log and **(d)** graph page showing real-time output voltage information of the I-TENG displayed in a mobile application.

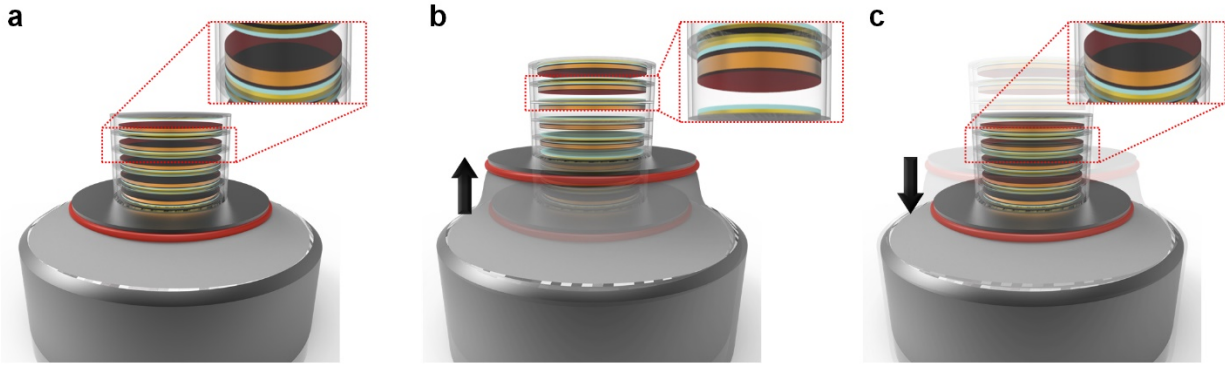

146

147 **Fig. 7 Schematic process of applying kinetic energy.** (a) The initial condition of the I-TENG on  
148 an electrodynamic transducer. (b) Application of upward energy to the I-TENG with the  
149 electrodynamic transducer. (c) The final state of the I-TENG on the electrodynamic transducer.

150

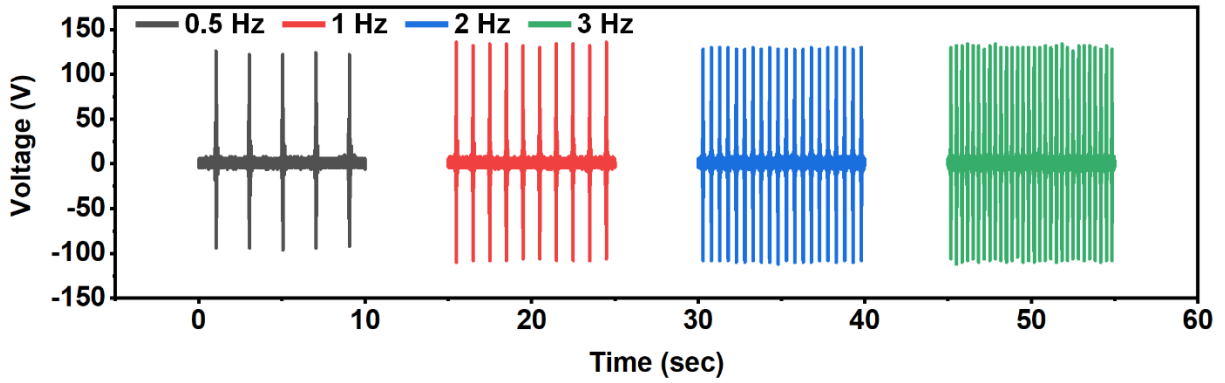

151

152 **Fig. 8 Output voltage performance of the I-TENG as a function of a frequency range from**  
153 **0.5 to 3 Hz.**

154

155

156

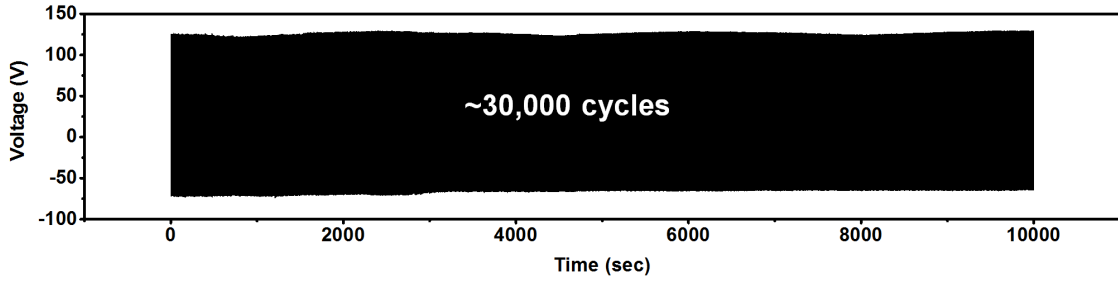

157

158 **Fig. 9 Durability of the five-stacked I-TENG over 30,000 cycles.**

159

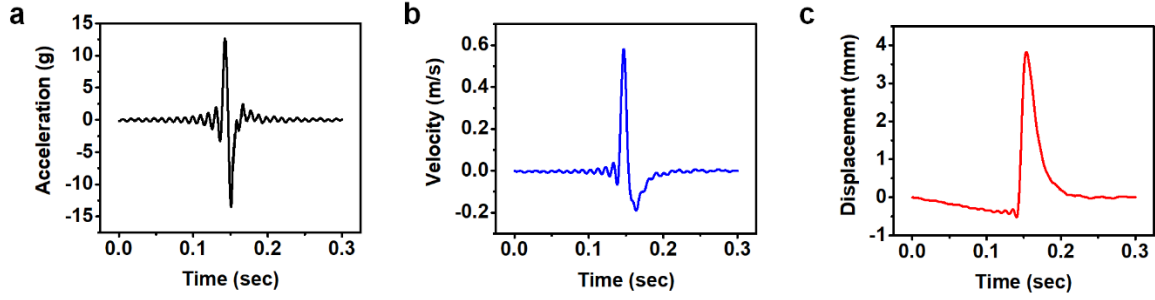

160

161 **Fig. 10 Vertical input kinetic information of the I-TENG. (a)** Vertical acceleration of the I-  
162 TENG. **(b)** Vertical velocity of the I-TENG. **(c)** Vertical displacement of the I-TENG.

163



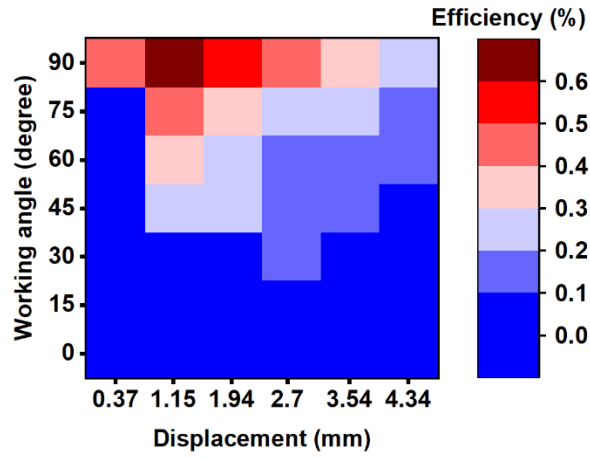

164

165 **Fig. 11 The energy conversion efficiency of the I-TENG depending on different displacement**  
 166 **and working angle conditions.**

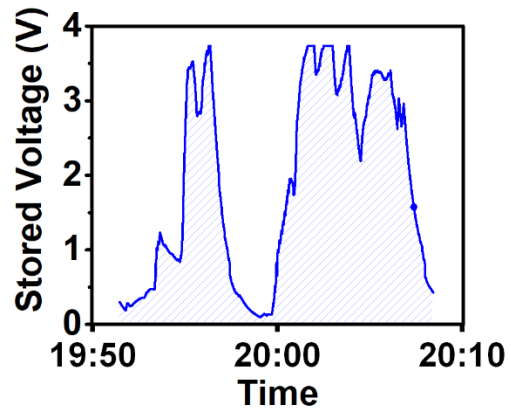

167

168 **Fig. 12 Real-time energy harvesting performance of the I-TENGs while walking, running,**  
169 **climbing stairs, and resting.**

170

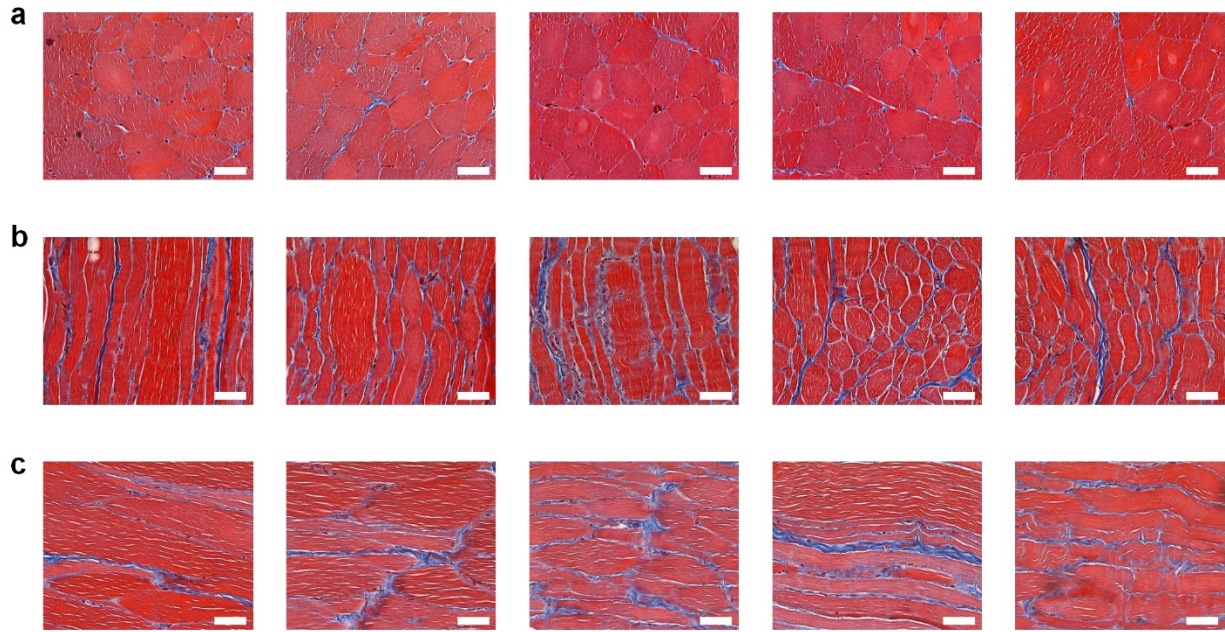

171

172 **Fig. 13 Masson's trichrome stain results.** Masson's trichrome stain results: (a) no inflammatory  
 173 cells and scanty amount of perivascular fibrosis observed in normal muscle; (b) prominent fibrosis  
 174 and a mild inflammatory response around the encapsulated device; and (c) similar fibrosis and  
 175 inflammatory response around a commercial medical device. Red, white, and blue represent  
 176 normal muscle, fat, and infection, respectively. scale bar, 50  $\mu\text{m}$ . The Masson's trichrome stain  
 177 results randomly selected 5 groups of three different conditions.

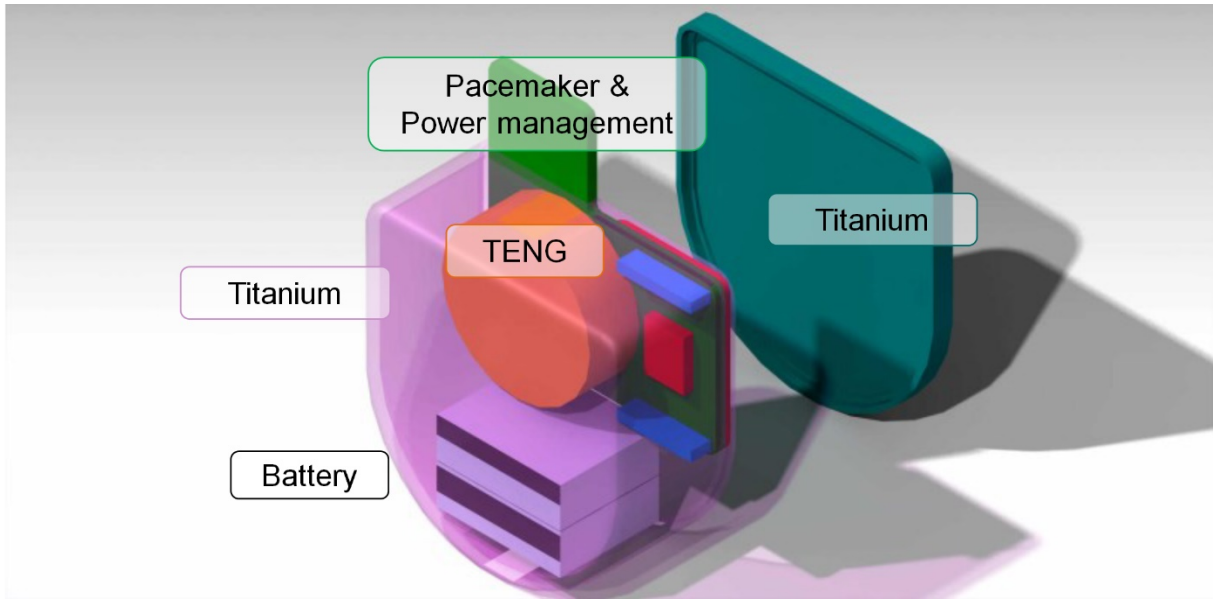

178

179 **Fig. 14 Schematic structural image of the self-rechargeable cardiac pacemaker.**

180

**a**

|               |     |
|---------------|-----|
| Mode          | VOO |
| VP (V)        | 5   |
| VPW (ms)      | 1   |
| VS (mV)       | 1   |
| LRI (bpm)     | 150 |
| AVI (ms)      | 150 |
| PVARP (ms)    | 400 |
| VRP (ms)      | 250 |
| Sampling (Hz) | 200 |

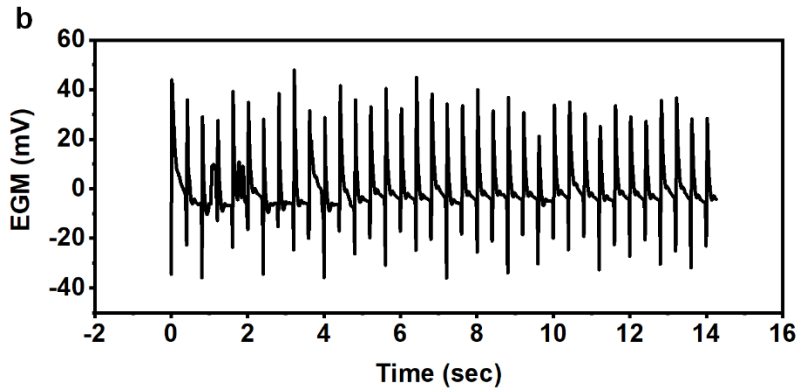

181

182 **Fig. 15 VOO mode operation of the self-rechargeable pacemaker. (a)** Parameters of the self-  
 183 powered cardiac pacemaker. **(b)** Ventricular EGM signals during ventricle pacing at 150 bpm.

184

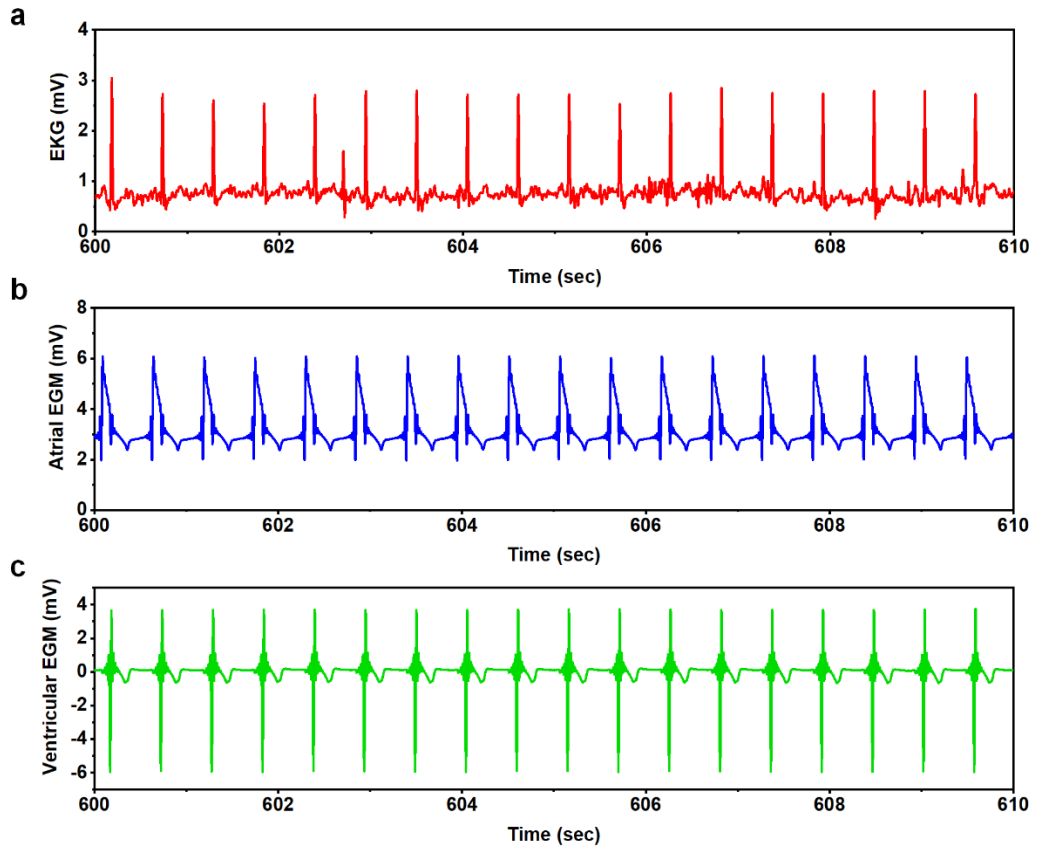

185

186 **Fig. 16 Electrogram signals in the normal condition. (a)** Electrocardiogram (EKG), **(b)** atrial  
187 EGM, and **(c)** ventricle EGM signals.

188

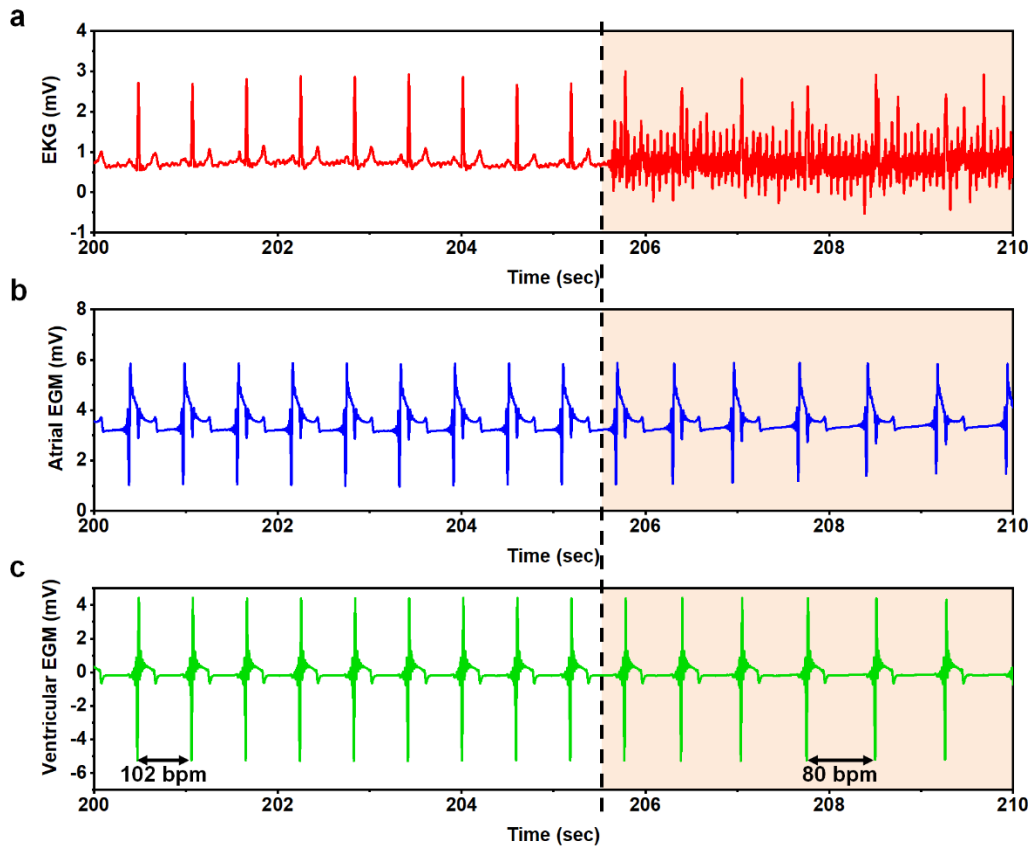

189

190 **Fig. 17** Electrogram signals before and after adenosine injection. (a) EKG, (b) atrial EGM,  
 191 and (c) ventricle EGM signals.

192

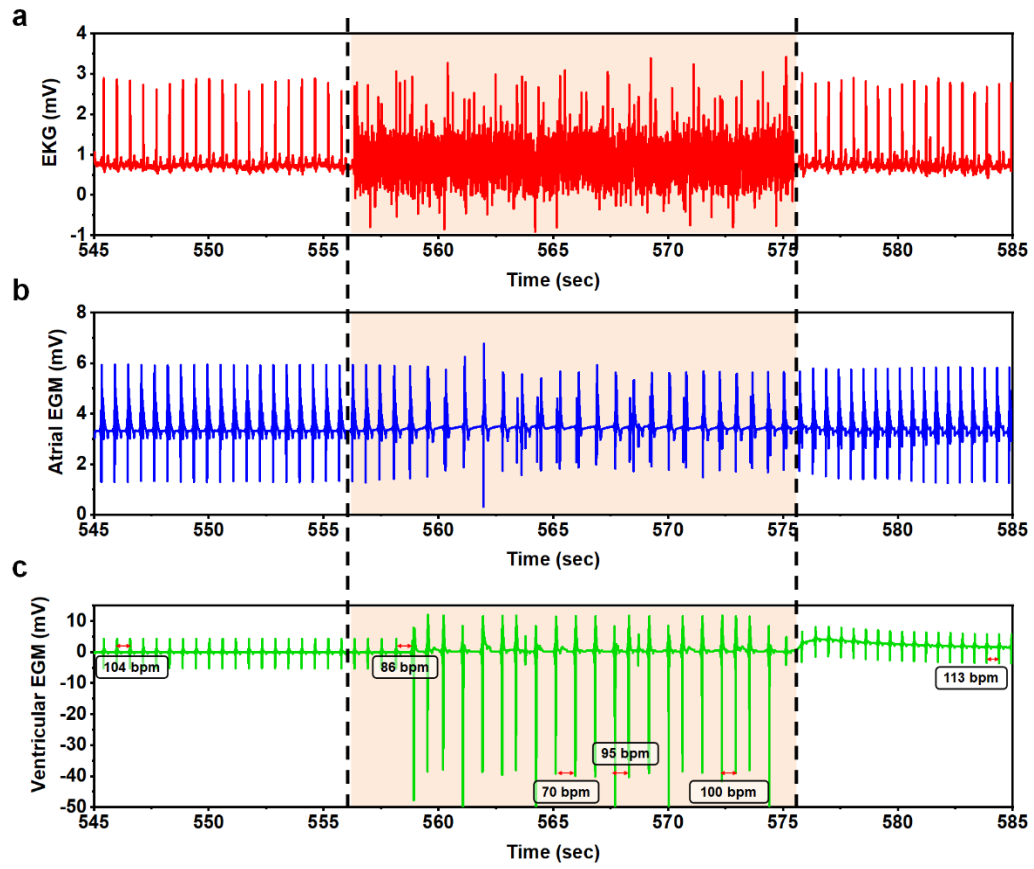

193

194 **Fig. 18** Electrogram signals with pacemaker during temporary bradycardia. (a) EKG, (b)

195 atrial EGM, and (c) ventricle EGM signals.

196



| Subject                            |          | Objects | Objects(%) | Area(%)    |
|------------------------------------|----------|---------|------------|------------|
| Reference (x12.5)                  | base     | 294     | 24.277456  | 89.752327  |
|                                    | fibrosis | 917     | 75.722542  | 10.247671  |
| Reference (x400)-1                 | base     | 372     | 17.953669  | 91.684433  |
|                                    | fibrosis | 1700    | 82.046333  | 8.3155689  |
| Reference (x400)-2                 | base     | 103     | 17.820068  | 97.480957  |
|                                    | fibrosis | 475     | 82.179932  | 2.5190461  |
| Reference (x400)-3                 | base     | 434     | 29.265003  | 94.023598  |
|                                    | fibrosis | 1049    | 70.734993  | 5.9764004  |
| Reference (x400)-4                 | base     | 520     | 37.708485  | 97.330269  |
|                                    | fibrosis | 859     | 62.291515  | 2.6697299  |
| Reference (x400)-5                 | base     | 823     | 77.714828  | 99.09906   |
|                                    | fibrosis | 236     | 22.285175  | 0.90094179 |
| Encapsulated device (x12.5)        | base     | 284     | 10.179212  | 81.966362  |
|                                    | fibrosis | 2506    | 89.820786  | 18.03364   |
| Encapsulated device (x400)-1       | base     | 1246    | 42.337749  | 70.49247   |
|                                    | fibrosis | 1697    | 57.662251  | 29.507532  |
| Encapsulated device (x400)-2       | base     | 459     | 29.291639  | 78.428154  |
|                                    | fibrosis | 1108    | 70.708359  | 21.571846  |
| Encapsulated device (x400)-3       | base     | 621     | 56.148281  | 74.556267  |
|                                    | fibrosis | 485     | 43.851719  | 25.443731  |
| Encapsulated device (x400)-4       | base     | 738     | 29.914877  | 77.775246  |
|                                    | fibrosis | 1729    | 70.085121  | 22.224751  |
| Encapsulated device (x400)-5       | base     | 691     | 39.942196  | 89.024048  |
|                                    | fibrosis | 1039    | 60.057804  | 10.975951  |
| Commercial medical device (x12.5)  | base     | 161     | 11.641359  | 80.368134  |
|                                    | fibrosis | 1222    | 88.358643  | 19.63187   |
| Commercial medical device (x400)-1 | base     | 545     | 40.580788  | 87.909172  |
|                                    | fibrosis | 798     | 59.419212  | 12.090829  |
| Commercial medical device (x400)-2 | base     | 603     | 33.077347  | 76.231331  |
|                                    | fibrosis | 1220    | 66.922653  | 23.768671  |
| Commercial medical device (x400)-3 | base     | 198     | 22.34763   | 76.65596   |
|                                    | fibrosis | 688     | 77.652367  | 23.344038  |
| Commercial medical device (x400)-4 | base     | 428     | 23.790995  | 75.031876  |
|                                    | fibrosis | 1371    | 76.209007  | 24.968126  |
| Commercial medical device (x400)-5 | base     | 309     | 25.203915  | 79.470139  |
|                                    | fibrosis | 917     | 74.796082  | 20.529861  |

197 **Table 1. The Masson's trichrome stain results.**
